# Supplementary material
Source: publisher figshare collection journal article supplement (https://gsajournals.figshare.com/ndownloader/files/27046430)
Supplement: Supplementary file 1 [file 27046430]

**Gene**

1. DCLRE1C
2. MSH2
3. NBN
4. NHEJ1
5. MRE11
6. PAPD7
7. RAD50
8. RAD54B
9. XRCC6
10. XRCC5
11. POLA1
12. ATP23
13. BABAM1
14. TDP2
15. SLX4
16. SLX1A
17. SLX1B
18. NABP1
19. NABP2
20. RAD51AP1
21. RAD51
22. SEM1
23. HUS1
24. H2AFX
25. BRCC3
26. RAD54B
27. EYA1
28. XRCC2
29. BRIP1
30. BLM
31. BRCA2
32. TEX15
33. RAD54L
34. RAD51
35. ERCC4
36. APLF
37. XRCC4
38. BRCA1
39. UBE2N
40. UIMC1
41. SOD1
42. CIB1
43. VCP
44. RAD21
45. TRIP13
46. FEN1
47. RECQL4
48. TP53
49. RECQL
50. RAD52
51. FAM175A
52. LIG4
53. UBE2V2
54. EYA3
55. RNF8
56. APBB1
57. ERCC1
58. KAT5
59. BRE
60. APTX
61. RTEL1
62. PRKDC
63. RNF168
64. SETX
65. MLH1
66. TDP1
